# ANESTHESIOLOGY

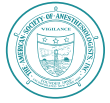

## PERSONALIZED PEEP: Options for Getting It Just Right

Intraoperative lung protective ventilation includes<sup>1</sup>

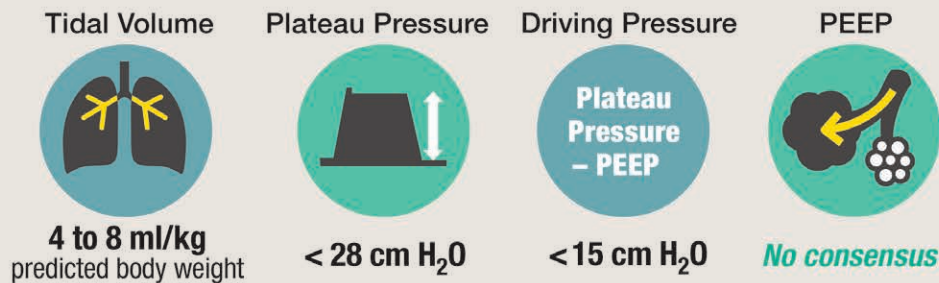

Individualized PEEP can be titrated a few ways

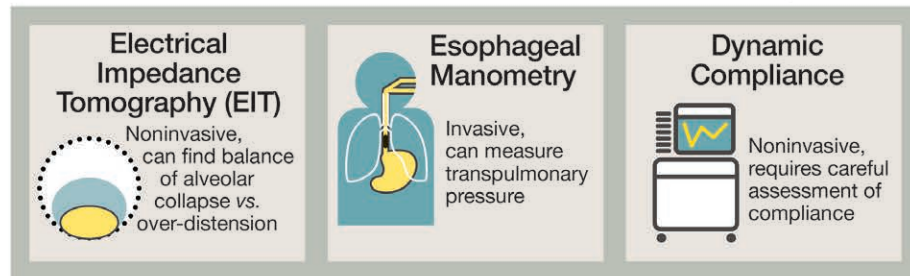

EIT-titrated PEEP was studied<sup>2</sup> in abdominal surgery

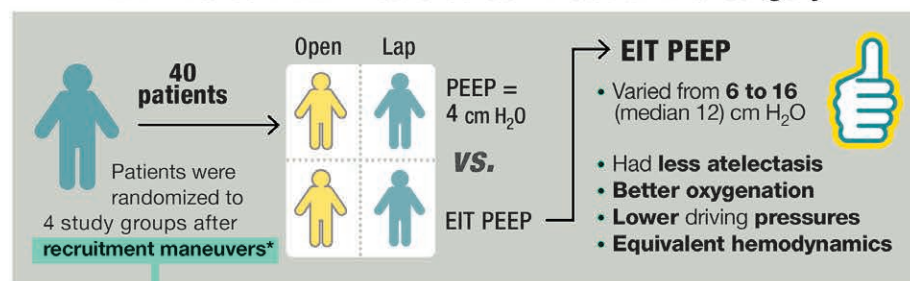

\*The recruitment maneuver

Tidal Volume = 6 ml/kg predicted body weight + PEEP = 20 cm H<sub>2</sub>O PIP = 40 cm H<sub>2</sub>O + RR = 20 Mode = PCV 2 min

While there is no convenient means for titrating PEEP at bedside, periodic recruitment and use of PEEP can improve oxygenation.

PCV, pressure control ventilation; PEEP, positive end-expiratory pressure; PIP, peak inspiratory pressure; RR, respiratory rate.  
 Infographic created by Jonathan P. Wanderer, Vanderbilt University Medical Center and James P. Rathmell, Brigham and Women's Health Care/Harvard Medical School; illustration by Annemarie Johnson, Vivo Visuals. Address correspondence to Dr. Wanderer: jonathan.p.wanderer@vanderbilt.edu.

1. Kacmarek RM, Villar J. Lung-protective ventilation in the operating room: Individualized positive end-expiratory pressure is needed! *ANESTHESIOLOGY* 2018; 129:1057–9

2. Pereira SM, Tucci MR, Morais CCA, Simões CM, Tonelotto BFF, Pompeo MS, Kay FU, Pelosi P, Vieira JE, Amato MBP. Individual positive end-expiratory pressure settings optimize intraoperative mechanical ventilation and reduce postoperative atelectasis. *ANESTHESIOLOGY* 2018; 129:1070–81
